# Supplementary material
Source: HighWire-hosted journal article supplement (http://www.qdcxjkg.com/highwire/filestream/126499/field_highwire_adjunct_files/0/Supplementary_material.pdf)
Supplement: Supplementary_material.pdf [file Supplementary_material.pdf]

## Online supplement

### Read codes for bronchiectasis

| medcode | (breakdown of code usage for the cohort) |
|---------|------------------------------------------|
| 2195    | Bronchiectasis (18,276)                  |
| 32679   | Bronchiectasis NOS (74)                  |
| 20364   | Recurrent bronchiectasis (50)            |
| 15693   | Tuberculous bronchiectasis (360)         |
| 41491   | Post-infective bronchiectasis (30)       |
| 56427   | Congenital bronchiectasis (3)            |
